# Supplementary material for: Divergent Effects of Glycemic Control and Bariatric Surgery on Circulating Concentrations of TMAO in Newly Diagnosed T2D Patients and Morbidly Obese
Source: MDPI journal article supplement (doi:10.3390/diagnostics12112783), 2022-11-14
Supplement: s1 [file s1]

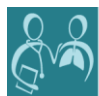

**Table S1.** SRM transitions and collision energies used in LC-MS/MS for the detection of TMAO,  $\gamma$ BB and d3-MeCar (IS)

| Compound      | Transition            | Collision energy |
|---------------|-----------------------|------------------|
| TMAO          | 76 $\rightarrow$ 58   | 16               |
| TMAO          | 76 $\rightarrow$ 59   | 8                |
| $\gamma$ BB   | 146 $\rightarrow$ 87  | 16               |
| $\gamma$ BB   | 146 $\rightarrow$ 60  | 12               |
| d3-MeCar (IS) | 165 $\rightarrow$ 63  | 16               |
| d3-MeCar (IS) | 165 $\rightarrow$ 103 | 16               |
